# Supplementary material
Source: publisher figshare collection journal article supplement (https://gsajournals.figshare.com/ndownloader/files/39519292)
Supplement: Supplementary file 1 [file 39519292]

#NEXUS
begin taxa;
	dimensions ntax=19;
	taxlabels 
		'wMau Meany2019'
		'DNikananu L2'
		'DCurta L1'
		'DLeontia L1'
		'DBocki L1'
		'wHa Ellegaard2013'
		'wAura Turelli2018'
		'wTria Turelli2018'
		'wAna Salzberg2005'
		'wPan P1 Turelli2018'
		'wRi Klasson2009'
		'DBicornuta L1'
		'wMel Wu2004'
		'DBurlai L1'
		'DChauvacae L1'
		DSeguyi
		'DTristis CM2'
		'wRec Metcalf2014'
		'DBaimaii L2'
		;
end;
begin trees;
	translate 
		1 'wMau Meany2019',
		2 'DNikananu L2',
		3 'DCurta L1',
		4 'DLeontia L1',
		5 'DBocki L1',
		6 'wHa Ellegaard2013',
		7 'wAura Turelli2018',
		8 'wTria Turelli2018',
		9 'wAna Salzberg2005',
		10 'wPan P1 Turelli2018',
		11 'wRi Klasson2009',
		12 'DBicornuta L1',
		13 'wMel Wu2004',
		14 'DBurlai L1',
		15 'DChauvacae L1',
		16 DSeguyi,
		17 'DTristis CM2',
		18 'wRec Metcalf2014',
		19 'DBaimaii L2'
		;
	tree tree1 = [&r](1:0.328623,((2:0.002253,3:0.005894):0.077985,((4:0.002495,5:0.00224):0.027784,(((6:0.024099,((7:5.2E-5,8:5.6E-5):3.06E-4,(9:3.81E-4,10:5.7E-5,11:5.7E-5):3.53E-4):0.027241):0.005367,(12:0.02564,(13:0.003353,(14:2.26E-4,15:2.16E-4):0.002352,(16:0.003769,(17:0.001292,18:0.002498):0.001186):1.42E-4):0.019294):0.005479):0.005227,19:0.072904):0.008592):0.048498):0.328623);
end;
